# Supplementary material
Source: PubMed Central journal article supplement (PMC1685844)
Supplement: rspb20063727s10.pdf [file rspb20063727s10.pdf]

## From the tropics to the poles: the basal metabolic rate of birds is associated with habitat temperature, not productivity

Craig R. White, Tim M. Blackburn, Graham R. Martin and Patrick J. Butler

*Supplementary Online Appendix:* Body mass (M, g), basal metabolic rate (BMR, ml O<sub>2</sub> min<sup>-1</sup>), capture locality (latitude and longitude, °), habitat annual net primary productivity (NPP, g C m<sup>-2</sup>), mean monthly precipitation (P, mm), intra-annual coefficient of variation of precipitation (P<sub>CV</sub>), mean annual ambient temperature (T<sub>a</sub>, °C), and annual temperature range (T<sub>r</sub>, °C).

| <b>Species</b>                      | <b>M</b> | <b>BMR</b> | <b>Lat</b> | <b>Long</b> | <b>NPP</b> | <b>P</b> | <b>P<sub>CV</sub></b> | <b>T<sub>a</sub></b> | <b>T<sub>r</sub></b> | <b>Captivity</b> | <b>Migratory Pattern</b> | <b>Reference</b> |
|-------------------------------------|----------|------------|------------|-------------|------------|----------|-----------------------|----------------------|----------------------|------------------|--------------------------|------------------|
| <i>Psaltriparus minimus</i>         | 5.5      | 0.363      | 34.1       | -118.2      | 344.7      | 22.7     | 1.086                 | 12.9                 | 11.7                 | 7+ Days          | sedentary                | 8                |
| <i>Sephanoides sephanoides</i>      | 5.74     | 0.303      | -33.3      | -71.2       | 558.2      | 50.9     | 1.049                 | 13.0                 | 12.8                 | 7+ Days          | sedentary                | 19               |
| <i>Todus mexicanus</i>              | 6.05     | 0.336      | 18.1       | -66.3       | 1120       | 121.5    | 0.306                 | 24.3                 | 6.1                  | Overnight        | sedentary                | 25               |
| <i>Parula americana</i>             | 7        | 0.368      | 29.7       | -82.3       | 802.6      | 111.8    | 0.512                 | 21.0                 | 10.2                 | Overnight        | migratory                | 39               |
| <i>Lichmera indistincta</i>         | 9        | 0.621      | -31.5      | 116.6       | 499        | 43.6     | 0.814                 | 17.6                 | 13.6                 | 7+ Days          | sedentary                | 9                |
| <i>Lonchura fuscans</i>             | 9.5      | 0.296      | 4.9        | 114.9       | 1143.5     | 272.0    | 0.235                 | 26.3                 | 7.6                  | Overnight        | sedentary                | 32               |
| <i>Acanthorhynchus tenuirostris</i> | 9.7      | 0.743      | -34.8      | 139.0       | 561.6      | 49.4     | 0.429                 | 15.7                 | 11.1                 | Overnight        | sedentary                | 34               |
| <i>Dendroica palmarum</i>           | 9.8      | 0.466      | 29.7       | -82.3       | 802.6      | 111.8    | 0.512                 | 21.0                 | 10.2                 | Overnight        | migratory                | 39               |
| <i>Dendroica dominica</i>           | 9.8      | 0.480      | 29.7       | -82.3       | 802.6      | 111.8    | 0.512                 | 21.0                 | 10.2                 | Overnight        | sedentary                | 39               |
| <i>Parus atricapillus</i>           | 10.3     | 0.710      | 42.4       | -76.5       | 733.3      | 81.1     | 0.116                 | 9.0                  | 10.6                 | 7+ Days          | sedentary                | 27               |
| <i>Geothlypis trichas</i>           | 10.6     | 0.514      | 29.7       | -82.3       | 802.6      | 111.8    | 0.512                 | 21.0                 | 10.2                 | Overnight        | sedentary                | 39               |
| <i>Dendroica coronata</i>           | 11.5     | 0.564      | 29.7       | -82.3       | 802.6      | 111.8    | 0.512                 | 21.0                 | 10.2                 | Overnight        | migratory                | 39               |
| <i>Zosterops lateralis</i>          | 11.78    | 0.477      | -30.6      | 151.7       | 750.7      | 68.1     | 0.438                 | 13.4                 | 13.5                 | 7+ Days          | sedentary                | 21               |
| <i>Lonchura malacca</i>             | 11.8     | 0.421      | 3.1        | 101.7       | 1115.3     | 202.2    | 0.280                 | 24.9                 | 9.5                  | 1-7 Days         | sedentary                | 11               |
| <i>Spizella passerina</i>           | 11.9     | 0.575      | 29.7       | -82.3       | 802.6      | 111.8    | 0.512                 | 21.0                 | 10.2                 | Overnight        | migratory                | 39               |
| <i>Wilsonia citrina</i>             | 12       | 0.642      | 29.7       | -82.3       | 802.6      | 111.8    | 0.512                 | 21.0                 | 10.2                 | Overnight        | migratory                | 39               |
| <i>Pipra mentalis</i>               | 12.3     | 0.582      | 9.2        | -79.8       | 829.7      | 244.2    | 0.563                 | 26.0                 | 6.5                  | 1-7 Days         | sedentary                | 1                |
| <i>Lonchura maja</i>                | 12.8     | 0.454      | 3.1        | 101.7       | 1115.3     | 202.2    | 0.280                 | 24.9                 | 9.5                  | 1-7 Days         | sedentary                | 11               |
| <i>Protonotaria citrea</i>          | 12.8     | 0.591      | 29.7       | -82.3       | 802.6      | 111.8    | 0.512                 | 21.0                 | 10.2                 | Overnight        | migratory                | 39               |
| <i>Carduelis tristis</i>            | 12.8     | 0.988      | 42.3       | -83.7       | 656        | 69.4     | 0.214                 | 9.1                  | 11.1                 | Overnight        | sedentary                | 10               |

| <b>Species</b>                      | <b>M</b> | <b>BMR</b> | <b>Lat</b> | <b>Long</b> | <b>NPP</b> | <b>P</b> | <b>P<sub>CV</sub></b> | <b>T<sub>a</sub></b> | <b>T<sub>r</sub></b> | <b>Captivity</b> | <b>Migratory Pattern</b> | <b>Reference</b> |
|-------------------------------------|----------|------------|------------|-------------|------------|----------|-----------------------|----------------------|----------------------|------------------|--------------------------|------------------|
| <i>Luscinia cyane</i>               | 13.4     | 0.518      | 3.1        | 101.7       | 1115.3     | 202.2    | 0.280                 | 24.9                 | 9.5                  | Overnight        | migratory                | 11               |
| <i>Ammodramus savannarum</i>        | 13.8     | 0.531      | 29.7       | -82.3       | 802.6      | 111.8    | 0.512                 | 21.0                 | 10.2                 | Overnight        | migratory                | 39               |
| <i>Hirundo tahitica</i>             | 14.07    | 0.528      | 3.1        | 101.7       | 1115.3     | 202.2    | 0.280                 | 24.9                 | 9.5                  | Overnight        | sedentary                | 6                |
| <i>Melospiza georgiana</i>          | 14.9     | 0.636      | 29.7       | -82.3       | 802.6      | 111.8    | 0.512                 | 21.0                 | 10.2                 | Overnight        | migratory                | 39               |
| <i>Eremopterix nigriceps</i>        | 15.2     | 0.570      | 21.3       | 41.7        | 45.3       | 11.8     | 0.729                 | 24.3                 | 14.1                 | 7+ Days          | nomadic                  | 29               |
| <i>Manacus vitellinus</i>           | 15.5     | 0.695      | 9.2        | -79.8       | 829.7      | 244.2    | 0.563                 | 26.0                 | 6.5                  | 1-7 Days         | sedentary                | 1                |
| <i>Luscinia svecica</i>             | 15.5     | 0.826      | 59.8       | 18.8        | 505.7      | 49.4     | 0.301                 | 5.9                  | 6.9                  | 1-7 Days         | migratory                | 17               |
| <i>Passerculus sandwichensis</i>    | 15.9     | 0.670      | 29.7       | -82.3       | 802.6      | 111.8    | 0.512                 | 21.0                 | 10.2                 | Overnight        | migratory                | 39               |
| <i>Carduelis flammea</i>            | 16       | 0.719      | 66.0       | 16.1        | 321        | 53.1     | 0.370                 | -0.8                 | 8.1                  | 7+ Days          | migratory                | 18               |
| <i>Passerculus sandwichensis</i>    | 16.7     | 0.854      | 34.1       | -119.1      | 456.3      | 27.1     | 1.045                 | 16.2                 | 10.7                 | 7+ Days          | sedentary                | 36               |
| <i>Phylidonyris novaehollandiae</i> | 17.3     | 0.947      | -34.8      | 139.0       | 561.6      | 49.4     | 0.429                 | 15.7                 | 11.1                 | Overnight        | sedentary                | 34               |
| <i>Passer montanus</i>              | 17.5     | 0.590      | 3.1        | 101.7       | 1115.3     | 202.2    | 0.280                 | 24.9                 | 9.5                  | Overnight        | sedentary                | 11               |
| <i>Parus majora</i>                 | 18.5     | 1.149      | 65.0       | 25.5        | 421.4      | 39.6     | 0.396                 | 2.4                  | 8.1                  | 1-7 Days         | sedentary                | 5                |
| <i>Seiurus noveboracensis</i>       | 18.7     | 0.832      | 29.7       | -82.3       | 802.6      | 111.8    | 0.512                 | 21.0                 | 10.2                 | Overnight        | migratory                | 39               |
| <i>Parus majorb</i>                 | 18.8     | 0.994      | 55.7       | 13.1        | 681.5      | 47.6     | 0.241                 | 8.0                  | 6.5                  | 1-7 Days         | sedentary                | 5                |
| <i>Seiurus aurocapillus</i>         | 19       | 0.719      | 29.7       | -82.3       | 802.6      | 111.8    | 0.512                 | 21.0                 | 10.2                 | Overnight        | migratory                | 39               |
| <i>Melospiza melodia</i>            | 19.1     | 0.758      | 29.7       | -82.3       | 802.6      | 111.8    | 0.512                 | 21.0                 | 10.2                 | Overnight        | migratory                | 39               |
| <i>Sitta carolinensis</i>           | 19.35    | 1.074      | 42.7       | -97.0       | 534.5      | 53.3     | 0.584                 | 9.2                  | 12.7                 | Overnight        | sedentary                | 16               |
| <i>Luscinia svecicasvecica</i>      | 19.9     | 0.770      | 66.0       | 16.1        | 321        | 53.1     | 0.370                 | -0.8                 | 8.1                  | 7+ Days          | migratory                | 18               |
| <i>Zonotrichia albicollis</i>       | 20.2     | 0.842      | 29.7       | -82.3       | 802.6      | 111.8    | 0.512                 | 21.0                 | 10.2                 | Overnight        | migratory                | 39               |
| <i>Eremalauda dunni</i>             | 20.6     | 0.830      | 22.3       | 41.8        | 32.4       | 7.6      | 1.030                 | 25.5                 | 14.0                 | 7+ Days          | sedentary                | 30               |
| <i>Thamnophilus punctatus</i>       | 21       | 1.020      | 9.0        | -79.7       | 829.7      | 244.2    | 0.563                 | 26.0                 | 6.5                  | Overnight        | sedentary                | 31               |
| <i>Amadina erythrocephala</i>       | 21.5     | 0.627      | -28.9      | 24.8        | 279.2      | 29.3     | 0.699                 | 17.5                 | 16.6                 | 7+ Days          | nomadic                  | 24               |
| <i>Ammomanes deserti</i>            | 21.5     | 0.694      | 22.9       | 41.2        | 35.7       | 7.6      | 0.978                 | 25.2                 | 13.8                 | 7+ Days          | sedentary                | 29               |
| <i>Poocetes gramineus</i>           | 21.5     | 0.817      | 29.7       | -82.3       | 802.6      | 111.8    | 0.512                 | 21.0                 | 10.2                 | Overnight        | migratory                | 39               |
| <i>Acrocephalus arundinaceus</i>    | 21.9     | 0.764      | 3.1        | 101.7       | 1115.3     | 202.2    | 0.280                 | 24.9                 | 9.5                  | Overnight        | migratory                | 11               |
| <i>Calandrella rufescens</i>        | 23.6     | 1.092      | 49.4       | 46.9        | 281.6      | 26.3     | 0.168                 | 7.1                  | 10.6                 | 7+ Days          | sedentary                | 29               |
| <i>Calandrella brachydactyla</i>    | 24       | 1.230      | 49.4       | 46.9        | 281.6      | 26.3     | 0.168                 | 7.1                  | 10.6                 | 7+ Days          | migratory                | 29               |
| <i>Picoides pubescens</i>           | 24.05    | 1.232      | 42.7       | -97.0       | 534.5      | 53.3     | 0.584                 | 9.2                  | 12.7                 | Overnight        | sedentary                | 16               |
| <i>Lichenostomus virescens</i>      | 25       | 1.057      | -31.9      | 115.8       | 532.8      | 50.4     | 0.915                 | 18.1                 | 10.3                 | 7+ Days          | sedentary                | 9                |

| <b>Species</b>                  | <b>M</b> | <b>BMR</b> | <b>Lat</b> | <b>Long</b> | <b>NPP</b> | <b>P</b> | <b>P<sub>CV</sub></b> | <b>T<sub>a</sub></b> | <b>T<sub>r</sub></b> | <b>Captivity</b> | <b>Migratory Pattern</b> | <b>Reference</b> |
|---------------------------------|----------|------------|------------|-------------|------------|----------|-----------------------|----------------------|----------------------|------------------|--------------------------|------------------|
| <i>Lullula arborea</i>          | 25.5     | 1.706      | 52.9       | 6.3         | 729.8      | 67.0     | 0.201                 | 9.4                  | 6.2                  | 7+ Days          | migratory                | 30               |
| <i>Chersomanes albobasciata</i> | 25.7     | 1.005      | 28.8       | 24.7        | 47.6       | 0.8      | 0.829                 | 21.6                 | 15.5                 | 7+ Days          | sedentary                | 29               |
| <i>Eremophila alpestris</i>     | 26       | 1.334      | 33.3       | -116.7      | 251        | 17.3     | 1.071                 | 13.3                 | 10.9                 | 7+ Days          | migratory                | 29               |
| <i>Zonotrichia leucophrys</i>   | 26.1     | 1.018      | 29.7       | -82.3       | 802.6      | 111.8    | 0.512                 | 21.0                 | 10.2                 | Overnight        | migratory                | 39               |
| <i>Pycnonotus finlaysoni</i>    | 26.3     | 0.671      | 3.1        | 101.7       | 1115.3     | 202.2    | 0.280                 | 24.9                 | 9.5                  | 1-7 Days         | sedentary                | 11               |
| <i>Mirafra erythroptera</i>     | 27.3     | 1.244      | 24.0       | 15.1        | 50.1       | 0.4      | 1.236                 | 24.0                 | 15.6                 | 7+ Days          | sedentary                | 35               |
| <i>Sialia mexicana</i>          | 27.5     | 1.260      | 33.8       | -117.0      | 234.8      | 16.9     | 1.065                 | 12.3                 | 12.0                 | Overnight        | migratory                | 26               |
| <i>Pycnonotus goiavier</i>      | 28.6     | 0.730      | 3.1        | 101.7       | 1115.3     | 202.2    | 0.280                 | 24.9                 | 9.5                  | 1-7 Days         | sedentary                | 11               |
| <i>Galerida cristata</i>        | 31.2     | 1.112      | 21.3       | 41.7        | 45.3       | 11.8     | 0.729                 | 24.3                 | 14.1                 | 7+ Days          | sedentary                | 29               |
| <i>Alauda arvensis</i>          | 31.7     | 2.156      | 52.9       | 6.3         | 729.8      | 67.0     | 0.201                 | 9.4                  | 6.2                  | 7+ Days          | sedentary                | 30               |
| <i>Cardinalis sinuatus</i>      | 32       | 1.067      | 32.2       | -110.9      | 220        | 12.6     | 0.870                 | 18.4                 | 15.3                 | 7+ Days          | sedentary                | 13               |
| <i>Saltator orenocensis</i>     | 32.7     | 0.935      | 8.6        | -67.6       | 665.7      | 113.9    | 0.906                 | 27.0                 | 7.6                  | 1-7 Days         | sedentary                | 4                |
| <i>Zonotrichia querula</i>      | 33.3     | 1.343      | 39.0       | -95.2       | 678.2      | 76.5     | 0.439                 | 13.3                 | 12.1                 | 7+ Days          | migratory                | 39               |
| <i>Copsychus saularis</i>       | 33.5     | 0.690      | 3.1        | 101.7       | 1115.3     | 202.2    | 0.280                 | 24.9                 | 9.5                  | Overnight        | sedentary                | 11               |
| <i>Merops viridis</i>           | 33.81    | 0.886      | 3.1        | 101.7       | 1115.3     | 202.2    | 0.280                 | 24.9                 | 9.5                  | Overnight        | sedentary                | 6                |
| <i>Colius colius</i>            | 35.1     | 0.529      | -33.1      | 22.3        | 397.3      | 40.9     | 0.169                 | 15.2                 | 15.2                 | 7+ Days          | sedentary                | 23               |
| <i>Alaemon alaudipes</i>        | 37.7     | 1.274      | 22.3       | 41.8        | 32.4       | 7.6      | 1.030                 | 25.5                 | 14.0                 | 7+ Days          | sedentary                | 30               |
| <i>Cardinalis cardinalis</i>    | 41.3     | 1.356      | 32.2       | -110.9      | 220        | 12.6     | 0.870                 | 18.4                 | 15.3                 | 7+ Days          | sedentary                | 13               |
| <i>Columbina inca</i>           | 42       | 0.777      | 32.2       | -110.9      | 220        | 12.6     | 0.870                 | 18.4                 | 15.3                 | 7+ Days          | sedentary                | 20               |
| <i>Xiphorhynchus guttatus</i>   | 45.2     | 1.332      | 9.0        | -79.7       | 829.7      | 244.2    | 0.563                 | 26.0                 | 6.5                  | Overnight        | sedentary                | 31               |
| <i>Saltator coerulescens</i>    | 47       | 1.166      | 8.6        | -67.6       | 665.7      | 113.9    | 0.906                 | 27.0                 | 7.6                  | 1-7 Days         | sedentary                | 4                |
| <i>Neophema petrophila</i>      | 48.4     | 1.895      | -30.3      | 115.0       | 492.2      | 52.8     | 0.909                 | 18.4                 | 12.8                 | 7+ Days          | sedentary                | 37               |
| <i>Melanocorypha calandra</i>   | 50.6     | 1.710      | 33.0       | 51.0        | 110.1      | 17.7     | 0.996                 | 13.3                 | 15.4                 | 7+ Days          | sedentary                | 29               |
| <i>Colius striatus</i>          | 51.2     | 0.709      | -29.6      | 30.4        | 710.9      | 67.8     | 0.654                 | 17.0                 | 11.9                 | 7+ Days          | sedentary                | 22               |
| <i>Melanerpes formicivorus</i>  | 73.1     | 2.232      | 36.4       | -121.6      | 495.3      | 35.6     | 1.010                 | 13.1                 | 10.0                 | 7+ Days          | sedentary                | 33               |
| <i>Sturnus vulgaris</i>         | 85       | 3.719      | 49.3       | -123.1      | 538.5      | 99.1     | 0.541                 | 8.7                  | 7.8                  | 7+ Days          | sedentary                | 15               |
| <i>Geophaps smithii</i>         | 89       | 1.261      | -21.0      | 118.0       | 195.2      | 27.8     | 1.008                 | 26.6                 | 13.9                 | 7+ Days          | sedentary                | 38               |
| <i>Coturnix pectoralis</i>      | 95.8     | 1.916      | -35.3      | 139.0       | 461.1      | 40.9     | 0.355                 | 15.2                 | 12.5                 | 7+ Days          | nomadic                  | 28               |
| <i>Sturnus cristatellus</i>     | 109.365  | 3.608      | 49.3       | -123.1      | 538.5      | 99.1     | 0.541                 | 8.7                  | 7.8                  | 7+ Days          | sedentary                | 15               |
| <i>Leptoptila verreauxi</i>     | 131      | 2.648      | 9.0        | -79.7       | 829.7      | 244.2    | 0.563                 | 26.0                 | 6.5                  | Overnight        | sedentary                | 31               |

| <b>Species</b>                  | <b>M</b> | <b>BMR</b> | <b>Lat</b> | <b>Long</b> | <b>NPP</b> | <b>P</b> | <b>P<sub>CV</sub></b> | <b>T<sub>a</sub></b> | <b>T<sub>r</sub></b> | <b>Captivity</b> | <b>Migratory Pattern</b> | <b>Reference</b> |
|---------------------------------|----------|------------|------------|-------------|------------|----------|-----------------------|----------------------|----------------------|------------------|--------------------------|------------------|
| <i>Platycercus zonarius</i>     | 131.8    | 2.367      | -29.5      | 115.8       | 428.1      | 44.7     | 0.837                 | 18.9                 | 14.6                 | 7+ Days          | sedentary                | 37               |
| <i>Trichoglossus haematodus</i> | 137.1    | 3.567      | -31.9      | 115.8       | 532.8      | 50.4     | 0.915                 | 18.1                 | 10.3                 | 7+ Days          | nomadic                  | 37               |
| <i>Pica nuttalli</i>            | 151.9    | 4.385      | 38.5       | -121.7      | 440.2      | 42.0     | 0.843                 | 15.0                 | 13.4                 | 7+ Days          | sedentary                | 12               |
| <i>Pica pica</i>                | 158.9    | 3.567      | 42.9       | -112.4      | 317.1      | 22.7     | 0.416                 | 6.6                  | 14.4                 | 7+ Days          | sedentary                | 12               |
| <i>Calidris tenuirostris</i>    | 198.2    | 6.005      | -18.0      | 122.4       | 279.8      | 48.3     | 1.306                 | 26.6                 | 11.1                 | Overnight        | migratory                | 2                |
| <i>Eolophus roseicapillus</i>   | 268.7    | 4.478      | -29.5      | 115.8       | 428.1      | 44.7     | 0.837                 | 18.9                 | 14.6                 | 7+ Days          | sedentary                | 37               |
| <i>Dacelo novaeguinae</i>       | 336      | 3.348      | -42.8      | 147.5       | 624.4      | 61.1     | 0.133                 | 11.0                 | 8.6                  | 7+ Days          | sedentary                | 7                |
| <i>Podargus strigoides</i>      | 341      | 3.353      | -42.0      | 147.0       | 676.2      | 51.6     | 0.169                 | 11.1                 | 11.9                 | 7+ Days          | sedentary                | 3                |
| <i>Pterocles orientalis</i>     | 386.4    | 5.813      | 30.9       | 34.8        | 96.2       | 16.8     | 1.050                 | 19.3                 | 11.6                 | 7+ Days          | nomadic                  | 14               |
| <i>Calyptorhynchus banksii</i>  | 535.5    | 8.867      | -29.5      | 115.8       | 428.1      | 44.7     | 0.837                 | 18.9                 | 14.6                 | 7+ Days          | sedentary                | 37               |
| <i>Cacatua tenuirostris</i>     | 549.9    | 9.465      | -29.5      | 115.8       | 428.1      | 44.7     | 0.837                 | 18.9                 | 14.6                 | 7+ Days          | sedentary                | 37               |
| <i>Cacatua galerita</i>         | 776.1    | 10.215     | -31.9      | 115.8       | 532.8      | 50.4     | 0.915                 | 18.1                 | 10.3                 | 7+ Days          | sedentary                | 37               |

## REFERENCES

- 1 Bartholomew, G. A., Vleck, C. M. & Bucher, T. L. 1983 Energy metabolism and nocturnal hypothermia in two tropical passerine frugivores, *Manacus vitellinus* and *Pipra mentalis*. *Physiological Zoology* **56**, 370-379.
- 2 Battley, P. F., Dekinga, A., Dietz, M. W., Piersma, T., Tang, S. X. & Hulsman, K. 2001 Basal metabolic rate declines during long-distance migratory flight in great knots. *Condor* **103**, 838-845.
- 3 Bech, C. & Nicol, S. C. 1999 Thermoregulation and ventilation in the tawny frogmouth, *Podargus strigoides*: a low-metabolic avian species. *Australian Journal of Zoology* **47**, 143-153.
- 4 Bosque, C., Pacheco, M. A. & Siegel, R. B. 1999 Maintenance energy costs of two partially folivorous tropical passerines. *Auk* **116**, 246-252.
- 5 Broggi, J., Orell, M., Hohtola, E. & Nilson, J. A. 2004 Metabolic response to temperature variation in the great tit: an interpopulation comparison. *Journal of Animal Ecology* **73**, 967-972.
- 6 Bryant, D. M., Hails, C. J. & Tatner, P. 1984 Reproductive energetics of 2 tropical bird species. *Auk* **101**, 25-37.
- 7 Buttemer, W. A., Nicol, S. C. & Sharman, A. 2003 Thermoenergetics of pre-moulting and moulting kookaburras (*Dacelo novaeguinae*): they're laughing. *Journal of Comparative Physiology B* **173**, 223-230.

- 8 Chaplin, S. B. 1982 The energetic significance of huddling behavior in common bushtits (*Psaltriparus minimus*). *Auk* **99**, 424-430.
- 9 Collins, B. G., Cary, G. & Payne, S. 1980 Metabolism, thermoregulation and evaporative water loss in 2 species of Australian nectar-feeding birds (family Meliphagidae). *Comparative Biochemistry and Physiology A* **67**, 629-635.
- 10 Dawson, W. R. & Carey, C. 1976 Seasonal acclimatization to temperature in cardueline finches. *Journal of Comparative Physiology* **112**, 317-333.
- 11 Hails, C. J. 1983 The metabolic rate of tropical birds. *Condor* **85**, 61-65.
- 12 Hayworth, A. M. & Weathers, W. W. 1984 Temperature regulation and climatic adaptation in black-billed and yellow-billed magpies. *Condor* **86**, 19-26.
- 13 Hinds, D. S. & Calder, W. A. 1973 Temperature regulation of the pyrrhuloxia and the Arizona cardinal. *Physiological Zoology* **46**, 55-71.
- 14 Hinsley, S. A., Ferns, P. N., Thomas, D. H. & Pinshow, B. 1993 Black-bellied sandgrouse (*Pterocles orientalis*) and pin-tailed sandgrouse (*Pterocles alchata*) - closely related species with differing bioenergetic adaptations to arid zones. *Physiological Zoology* **66**, 20-42.
- 15 Johnson, S. R. & Cowan, I. M. 1975 The energy cycle and thermal tolerance of the starlings (Aves, Sturnidae) in North-America. *Canadian Journal of Zoology* **53**, 55-68.
- 16 Liknes, E. T. & Swanson, D. L. 1996 Seasonal variation in cold tolerance, basal metabolic rate, and maximal capacity for thermogenesis in White-breasted Nuthatches *Sitta carolinensis* and Downy Woodpeckers *Picoides pubescens*, two unrelated arboreal temperate residents. *Journal of Avian Biology* **27**, 279-288.
- 17 Lindström, A. & Kvist, A. 1995 Maximum energy intake rate is proportional to basal metabolic rate in passerine birds. *Proceedings of the Royal Society B: Biological Sciences* **261**, 337-343.
- 18 Lindström, A., Visser, G. H. & Daan, S. 1993 The energetic cost of feather synthesis is proportional to basal metabolic rate. *Physiological Zoology* **71**, 245-245.
- 19 López-Calleja, M. V. & Bozinovic, F. 1995 Maximum metabolic rate, thermal insulation and aerobic scope in a small-sized Chilean hummingbird (*Sephanoides sephanoides*). *The Auk* **112**, 1034-1036.
- 20 MacMillen, R. E. & Trost, C. H. 1967 Thermoregulation and water loss in the inca dove. *Comparative Biochemistry and Physiology* **20**, 263-273.
- 21 Maddocks, T. A. & Geiser, F. 1997 Energetics, thermoregulation and nocturnal hypothermia in Australian Silvereyes. *Condor* **99**, 104-112.
- 22 McKechnie, A. E. & Lovegrove, B. G. 2001 Heterothermic responses in the speckled mousebird (*Colius striatus*). *Journal of Comparative Physiology B* **171**, 507-518.

- 23 McKechnie, A. E. & Lovegrove, B. G. 2001 Thermoregulation and the energetic significance of clustering behavior in the white-backed mousebird (*Colius colius*). *Physiological and Biochemical Zoology* **74**, 238-249.
- 24 McKechnie, A. E. & Lovegrove, B. G. 2003 Facultative hypothermic responses in an Afrotropical arid-zone passerine, the red-headed finch (*Amadina erythrocephala*). *Journal of Comparative Physiology B* **173**, 339-346.
- 25 Merola-Zwartjes, M. & Ligon, J. D. 2000 Ecological energetics of the Puerto Rican tody: heterothermy, torpor, and intra-island variation. *Ecology* **81**, 990-1003.
- 26 Mock, P. J. 1991 Daily allocation of time and energy of western bluebirds feeding nestlings. *Condor* **93**, 598-611.
- 27 Rising, J. D. & Hudson, J. W. 1974 Seasonal variation in the metabolism and thyroid activity of the black-capped chickadee (*Parus atricapillus*). *Condor* **76**, 198-203.
- 28 Roberts, J. R. & Baudinette, R. V. 1986 Thermoregulation, oxygen consumption and water turnover in stubble quail, *Coturnix pectoralis*, and king quail, *Coturnix chinensis*. *Australian Journal of Zoology* **34**, 25-33.
- 29 Tieleman, B. I., Williams, J. B. & Bloomer, P. 2003 Adaptation of metabolism and evaporative water loss along an aridity gradient. *Proceedings of the Royal Society of London B* **270**, 207-214.
- 30 Tieleman, B. I., Williams, J. B. & Buschur, M. E. 2002 Physiological adjustments to arid and mesic environments in larks (Alaudidae). *Physiological and Biochemical Zoology* **75**, 305-313.
- 31 Vleck, C. M. & Vleck, D. 1979 Metabolic rate in five tropical bird species. *Condor* **81**, 89-91.
- 32 Weathers, W. W. 1977 Temperature regulation in the dusky munia, *Lonchura fuscans* (Cassin) (Estrildidae). *Australian Journal of Zoology* **25**, 193-199.
- 33 Weathers, W. W., Koenig, W. D. & Stanback, M. T. 1990 Breeding energetics and thermal ecology of the acorn woodpecker in central coastal California. *Condor* **92**, 341-359.
- 34 Weathers, W. W., Paton, D. C. & Seymour, R. S. 1996 Field metabolic rate and water flux of nectarivorous honeyeaters. *Australian Journal of Zoology* **44**, 445-460.
- 35 Williams, J. B. 1999 Heat production and evaporative water loss of Dune Larks from the Namib desert. *Condor* **101**, 432-438.
- 36 Williams, J. B. & Hansell, H. 1981 Bioenergetics of captive Belding's savannah sparrows (*Passerculus sandwichensis beldingi*). *Comparative Biochemistry and Physiology A* **69**, 783-787.
- 37 Williams, J. B., Withers, P. C., Bradshaw, S. D. & Nagy, K. A. 1991 Metabolism and water flux of captive and free-living Australian parrots. *Australian Journal of Zoology* **39**, 131-142.
- 38 Withers, P. C. & Williams, J. B. 1990 Metabolic and respiratory physiology of an arid-adapted Australian bird, the spinifex pigeon. *Condor* **92**, 961-969.

- 39 Yarbrough, C. G. 1971 The influence of distribution and ecology on the thermoregulation of small birds. *Comparative Biochemistry and Physiology A* **39**, 235-266.
